# Supplementary material
Source: Research Square preprint supplement (doi:10.21203/rs.3.rs-8933310/v1)
Supplement: Supplementary file 1 [file e8cd5bce54e7938e471d20bf.pdf]

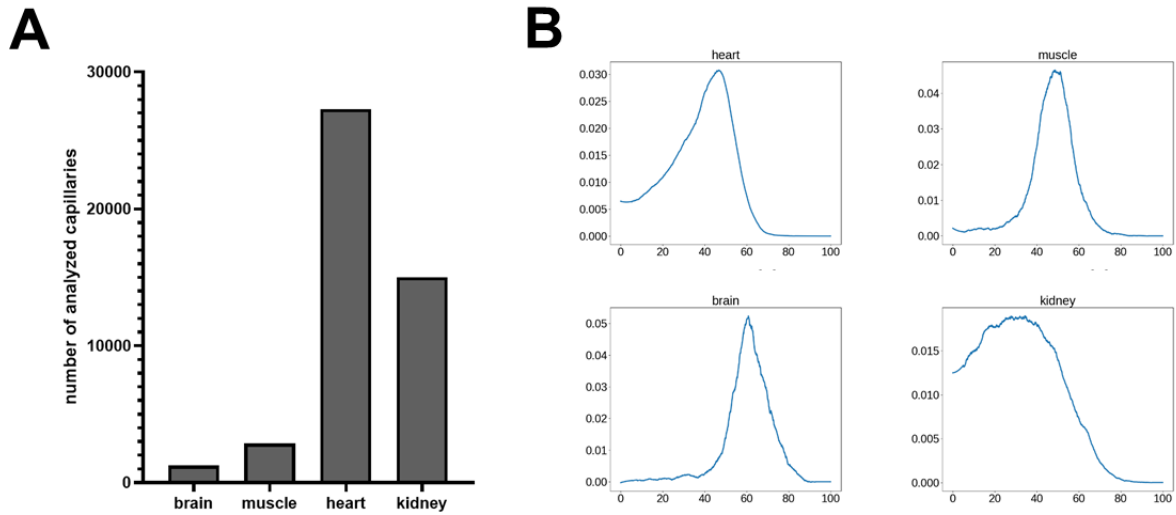

**Supp. Fig. 1 A** Due to differences in capillary density throughout the organs, different amounts of capillaries were investigated for pericyte coverage **B** Histograms of pericyte coverage in brain, muscle, heart and kidney demonstrate a high variability in coverage in kidneys with a rather narrow distribution in the brain and muscle.

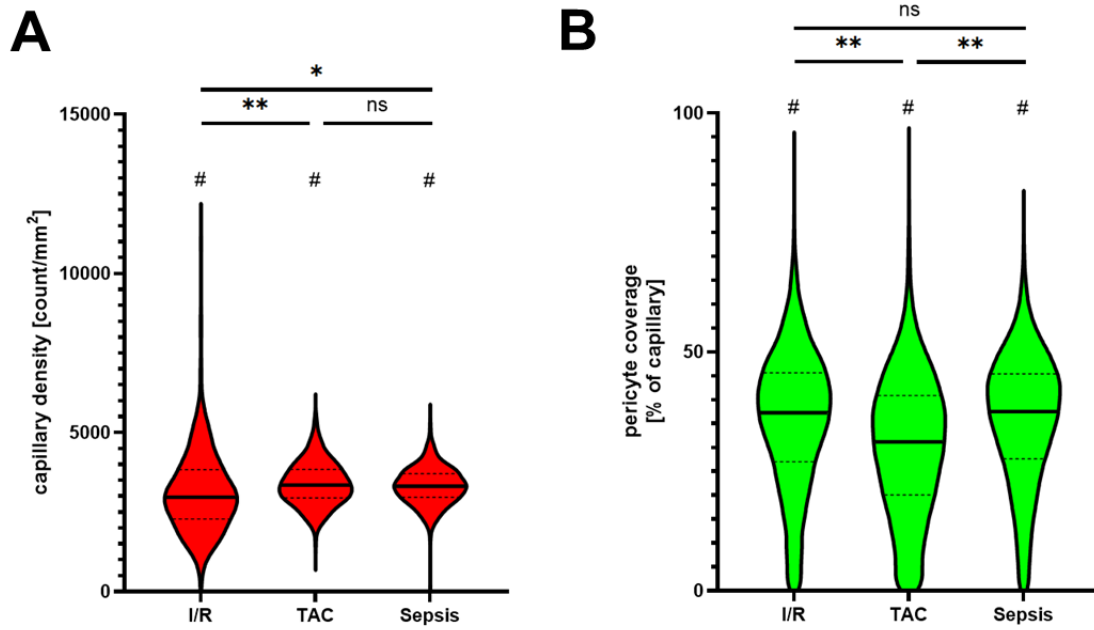

**Supp. Fig. 2 A** Capillary density (in counts/mm<sup>2</sup>) and **B** pericyte coverage (as a coverage percentage of capillaries) of murine hearts in different disease states shows a decrease in capillary density in all states, most prominently in the ischemic myocardium with a less pronounced decrease in pericyte coverage, while the highest loss in pericyte coverage can be seen during TAC (\* p<0.05 / \*\* p<0.001 / # p<0.001 vs. Ctrl.)

**A**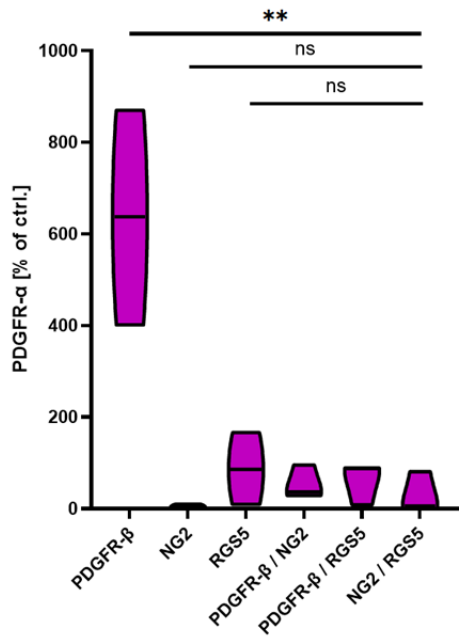**B**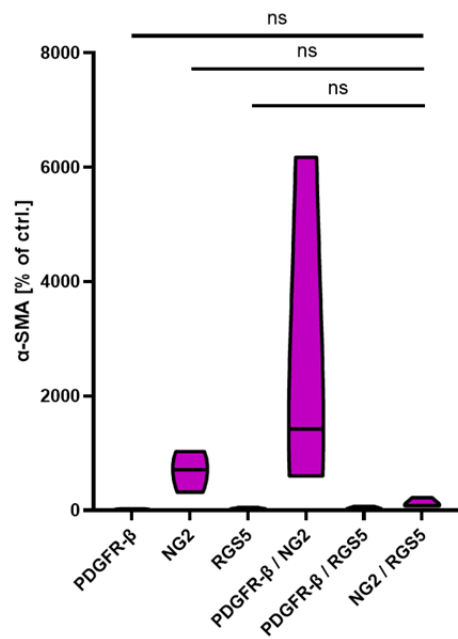

**Supp. Fig. 3** qPCR analysis of **A** PDGFR-α expression and **B** α-SMA expression in cells FACS-sorted after staining for the indicated pericyte markers shows a low degree of off-target marker expression in NG2/RGS5 double positive cells (\*\*
